# Supplementary material for: Elucidating the mechanisms by which disulfiram protects against obesity and metabolic syndrome
Source: PubMed Central journal article supplement (PMC7374720; doi:10.1038/s41514-020-0046-6), 2020-07-21

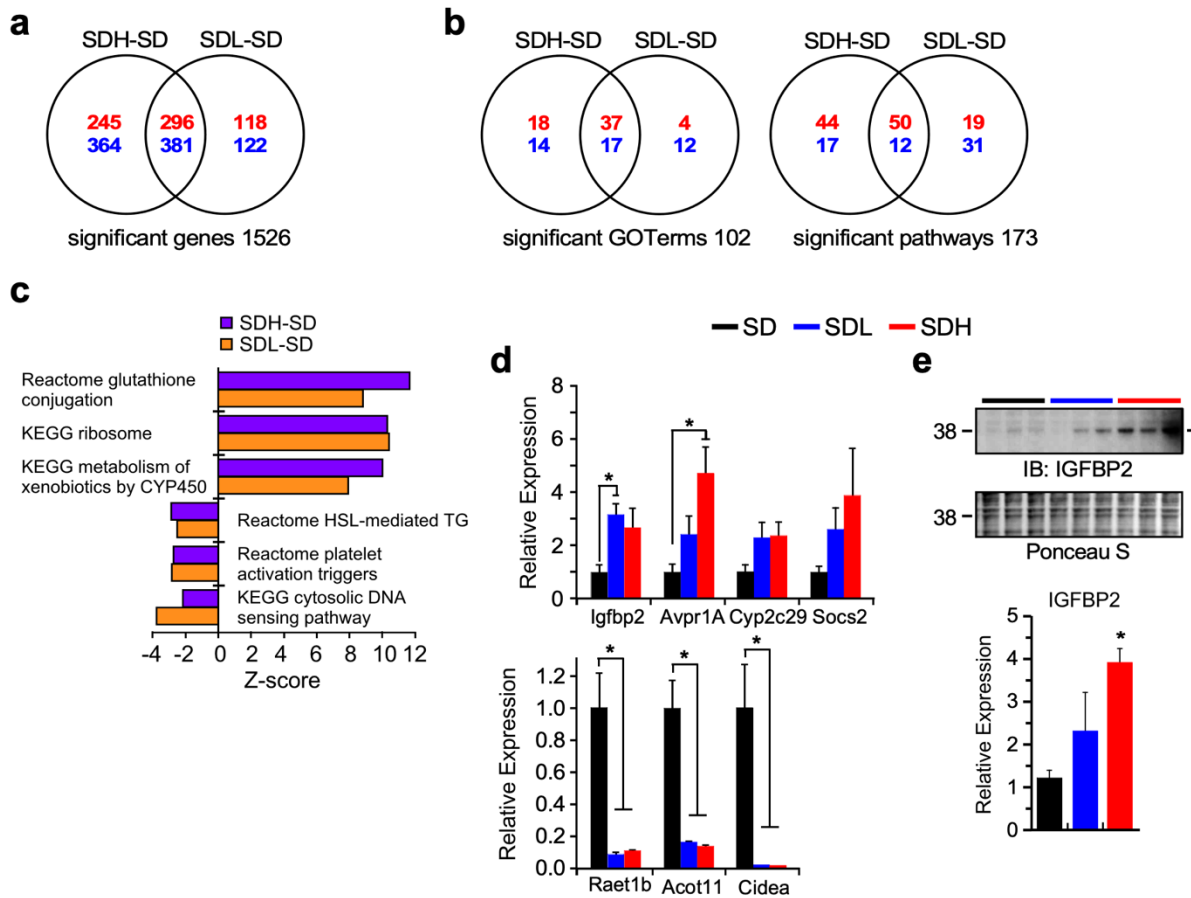

**Supplementary Fig. 1. Molecular alterations in the liver of standard diet-fed mice supplemented with DSF.** **a** Venn diagrams depicting genes significantly upregulated (red) and downregulated (green) in SD livers in response to low and high doses of DSF. **b** Venn diagrams depicting GO terms and canonical pathways significantly upregulated (red) or downregulated (green) in the SDH\_SD and SDL\_SD pairwise comparisons. **c** Enrichment of select pathways shared between the SDH\_SD and SDL\_SD pairwise comparisons. **d** Validation of microarray data by quantitative real-time PCR.  $n = 5$  per group. Values were normalized to SD controls. **e** Liver extracts were prepared from mice after 40 weeks on the indicated dietary intervention and immunoblotted for IGFBP2 (upper panel). Relative IGFBP2 protein expression after data normalization using Ponceau S staining of the membrane is depicted in the lower panel.  $n = 3$  per group. \*,  $P \leq 0.05$ . Related to Fig. 1

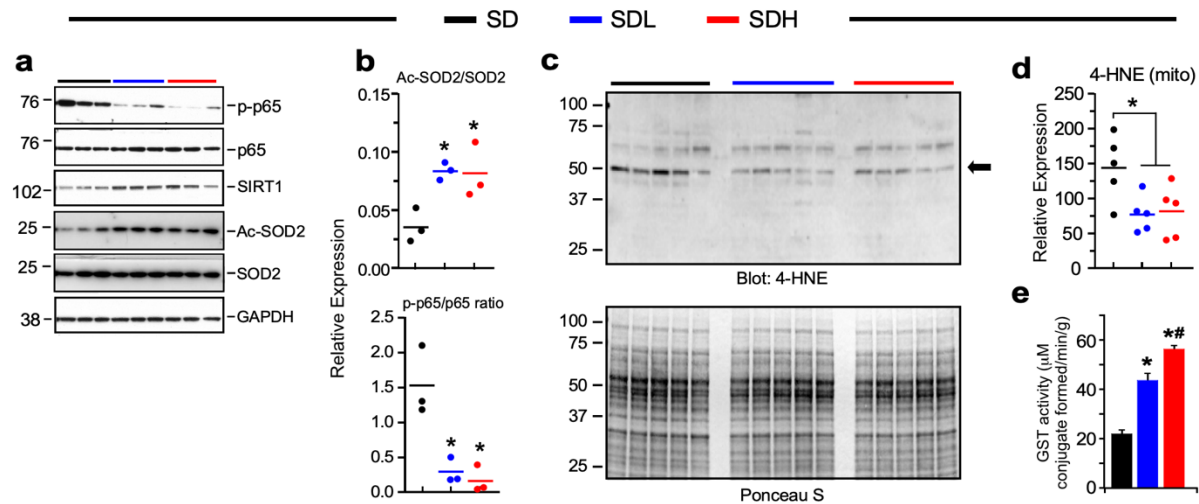

**Supplementary Fig. 2. Molecular and biochemical alterations in the liver of SD-fed mice supplemented with DSF.** **a** Immunoblotting of liver lysates for total and phosphorylated forms of p65Rel A, total and acetylated forms of SOD2, and SIRT1. **b** Relative acetylated/total ratio for p65Rel A and SOD2 after data normalization using GAPDH as loading control. **c** Detection of 4-HNE-conjugated proteins in liver homogenates. Ponceau S staining of the membrane confirmed equal protein load. Molecular mass markers (in kDa) are depicted on the left of immunoblots. **d** Densitometric analysis of 4-HNE signals shown in **c**. **e** GST activity measured in liver microsomal fractions. \*  $P \leq 0.05$  versus SD; #,  $P \leq 0.05$  versus SD + low DSF. Related to Fig. 2.

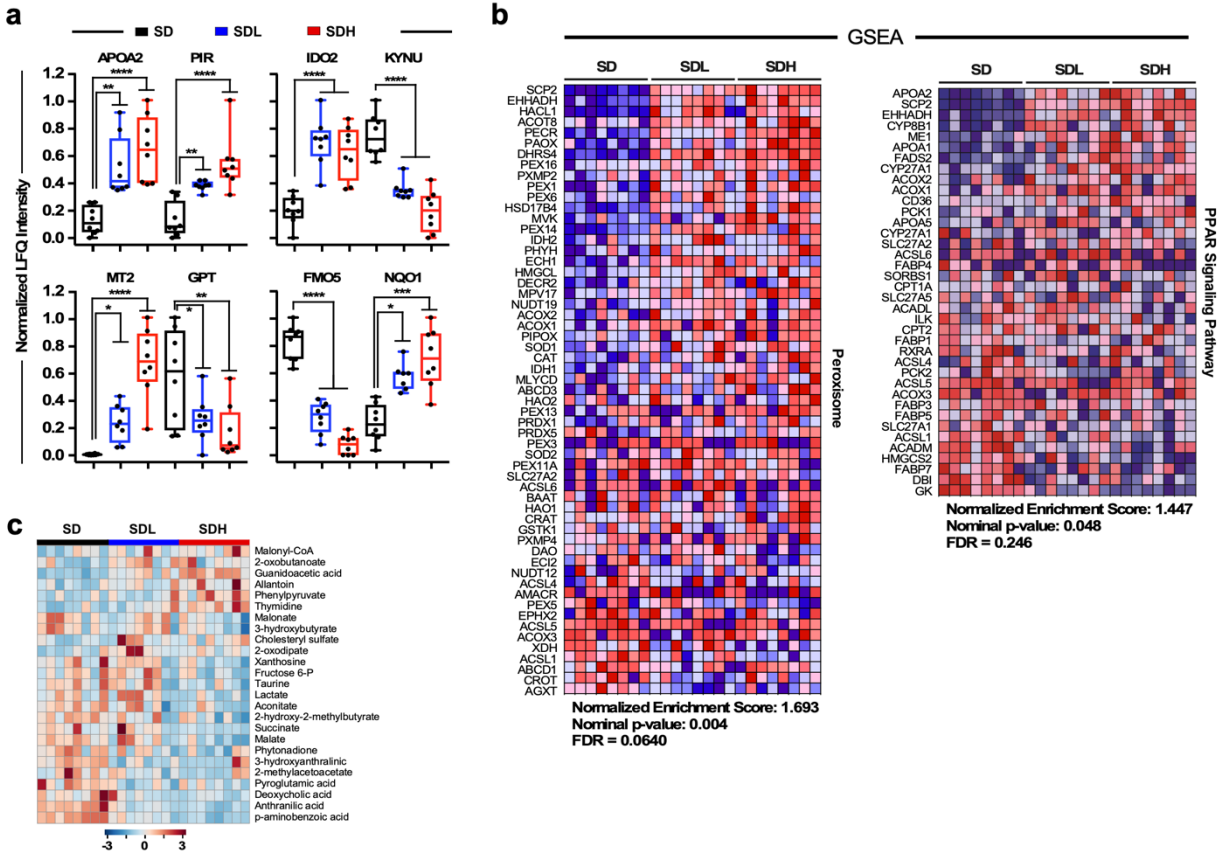

**Supplementary Fig. 3. Treatment with DSF for 12 weeks alters liver proteome and serum metabolome in chow-fed rats.** **a** Abundance of a select group of proteins significantly impacted by DSF treatment. Normalized LFQ intensity values are represented in box and whisker plot format ( $n = 8$  per group). Statistics for the effects of DSF intervention represent the p-value from a one-way ANOVA with Dunnett's post-hoc tests. \*, \*\*, \*\*\*, \*\*\*\*,  $P < 0.05, 0.01, 0.001, \text{ and } 0.0001$ . **b** Gene Set Enrichment Analysis (GSEA) depicting two sets of proteins whose expression was significantly impacted by DSF supplementation. These sets of proteins were grouped together based on their involvement in peroxisome (*left panel*) and PPAR signaling pathway (*right panel*). **c** Heatmap of the 25 metabolites in the rat serum metabolome that contributed to the separation between control and DSF-treated groups. Related to Fig. 3.

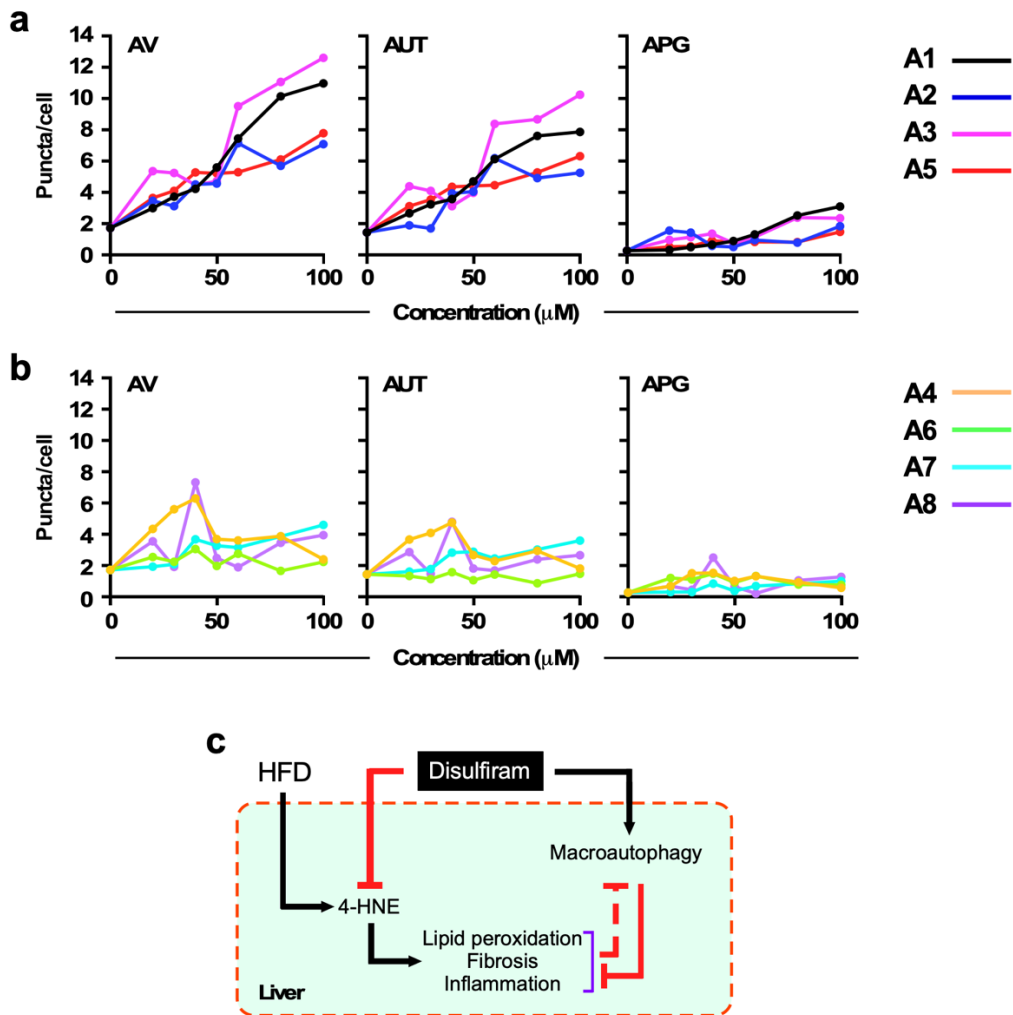

**Supplementary Fig. 4. Structure-activity of DSF derivatives on autophagy.** **a,b** NIH3T3 cells expressing the mCherry-GFP-LC3 reporter were exposed to the indicated concentrations of DSF (A1) and dithiocarbamate analogs (A2-A8) for 24 h and the changes in the number of autophagic vacuoles (AV), autolysosomes (AUT) or autophagosomes (APG) was quantified using high-content microscopy. Compounds with potent stimulatory effect on autophagy are shown in **a** and those with a more discrete effect in **b**. All values are mean of 4 individual wells and quantifications were done in at least 2500 cells per condition in three different experiments using high-content microscopy. Abbreviations: A1, bis(diethylthiocarbamate) disulfide aka disulfiram; A2, ammonium pyrrolidinedithiocarbamate; A3,  $\text{Mn}^{2+}$ - $\text{Zn}^{2+}$  ethylenebis(dithiocarbamate); A4,  $\text{Mn}^{2+}$  ethylenebis(dithiocarbamate) aka pestanal; A5,  $\text{Na}^+$  diethyldithiocarbamate trihydrate; A6, triethylammonium *N*-(3,4-dichlorophenyl) dithiocarbamate; A7, *S*-cyanomethyl-*N*-methyl-*N*-(pyridin-4-yl) dithiocarbamate; A8,  $\text{Zn}^{2+}$  dimethyldithiocarbamate. **c** Schematic model of the proposed dual mechanism of action of DSF in its protective effect against high-fat diet (HFD). The cellular processes inhibited through the effect of DSF on 4-HNE levels and autophagy are indicated. Related to Fig. 4.

**Supplementary Table 1.** Partial list of genes reciprocally affected in response to DSF supplementation in male C57BL/6 mice fed either an HFD or SD diet. Related to Fig. 1.

| Gene name | Definition/Function                                                 | zratio        |               |               |
|-----------|---------------------------------------------------------------------|---------------|---------------|---------------|
|           |                                                                     | HFD-SD        | HFDH-HFD      | HFDL-HFD      |
| Cyp2b9    | Oxidoreductase activity toward steroids, FA and xenobiotics         | <b>17.65</b>  | <b>-9.00</b>  | -7.82         |
| Upp2      | Liver-specific uridine phosphorylase 2                              | <b>5.76</b>   | <b>-4.01</b>  | -0.89         |
| Gstm2     | GST-class Mu - detoxification of electrophilic compounds            | <b>5.10</b>   | <b>-2.57</b>  | -3.36         |
| Jak3      | Cytokine receptor-mediated intracellular signal transduction        | <b>3.27</b>   | <b>-1.64</b>  | -0.85         |
| Cyp2b13   | Oxidoreductase activity                                             | <b>17.92</b>  | <b>-16.03</b> | <b>-14.29</b> |
| Cidec     | Binds to lipid droplets and regulates their enlargement             | <b>6.47</b>   | <b>-7.36</b>  | <b>-9.56</b>  |
| Hk2       | Hexokinase 2 - involved in the increased rate of glycolysis         | <b>6.18</b>   | <b>-6.36</b>  | <b>-7.33</b>  |
| Tceal8    | Transcription elongation factor A-like 8                            | <b>5.13</b>   | <b>-7.18</b>  | <b>-8.22</b>  |
| Raetib    | Retinoic acid early transcript beta – macrophage activation         | <b>4.52</b>   | <b>-12.08</b> | <b>-11.58</b> |
| Vldr      | Very low-density lipoprotein receptor – triglyceride metab.         | <b>3.93</b>   | <b>-6.08</b>  | <b>-6.50</b>  |
| Spp1      | Osteopontin – acts as a cytokine by reducing IL-10 production       | <b>3.60</b>   | <b>-3.85</b>  | <b>-6.90</b>  |
| Hsd3b5    | 3 $\beta$ -HSD - Biosynthesis of hormonal steroids                  | <b>-20.04</b> | <b>15.81</b>  | <b>20.75</b>  |
| Igfbp2    | IGF binding protein 2 – prolongs IGFs' half-life                    | <b>-4.27</b>  | <b>8.13</b>   | <b>9.14</b>   |
| Cyp7b1    | Homeostasis of cholesterol, bile acids and oxysterols               | <b>-3.99</b>  | <b>5.85</b>   | <b>6.27</b>   |
| Cdh1      | E-cadherin – mechanisms regulating cell-cell adhesion               | <b>-3.58</b>  | <b>5.70</b>   | <b>4.43</b>   |
| Elov13    | Elongation of very long chain fatty acids, e.g. C18-acylCoA         | <b>-6.58</b>  | <b>2.43</b>   | -0.12         |
| C6        | Key role in the innate and adaptive immune response                 | <b>-4.73</b>  | <b>5.75</b>   | 4.37          |
| Mup21     | Major urinary protein 21 – pheromone ligand                         | <b>-3.98</b>  | <b>4.75</b>   | 3.91          |
| Gstp1     | GST-class Pi – conjugation of reduced glutathione to electrophiles. | <b>-3.61</b>  | <b>6.06</b>   | 3.59          |

| Gene name | Definition/Function                                                         | SDH-SD       | SDL-SD       |
|-----------|-----------------------------------------------------------------------------|--------------|--------------|
| Cyp2b20   | aka Cyp2b6. Steroid, ketone and xenobiotic metabolism                       | <b>18.41</b> | <b>24.34</b> |
| Tff3      | trefoil factor 3 promotes the mobility of epithelial cells in healing proc. | <b>12.99</b> | <b>12.41</b> |
| Mt2       | Melatonin Receptor 1B                                                       | <b>12.41</b> | <b>9.23</b>  |
| Lpl       | lipoprotein lipase                                                          | <b>11.04</b> | <b>6.09</b>  |
| Cxcl1     | Chemokine (C-X-C Motif) Ligand 1                                            | <b>9.37</b>  | <b>9.09</b>  |

|         |                                                                 |               |               |
|---------|-----------------------------------------------------------------|---------------|---------------|
| Hsd17b9 | retinol dehydrogenase 5                                         | <b>9.37</b>   | <b>9.71</b>   |
| Gsta2   | glutathione S-transferase alpha 2                               | <b>9.04</b>   | <b>5.50</b>   |
| Slc39a4 | solute carrier family 39 (zinc transporter). Zinc uptake        | <b>8.60</b>   | <b>12.54</b>  |
| Rbp1    | retinol binding protein 1, cellular                             | <b>8.51</b>   | <b>6.97</b>   |
| Socs3   | suppressor of cytokine signaling 3. JAK2 inhibitor              | <b>8.48</b>   | <b>7.14</b>   |
| Cyp2c29 | Has aldehyde oxygenase activity. Xenobiotic metabolism          | <b>7.96</b>   | <b>9.76</b>   |
| Cfd     | complement factor D (adipsin), serine protease                  | <b>-15.23</b> | <b>-17.91</b> |
| Cidea   | cell death-inducing DFFA-like effector a                        | <b>-14.49</b> | <b>-19.49</b> |
| Per2    | period circadian clock 2                                        | <b>-9.12</b>  | <b>-5.72</b>  |
| Raet1b  | retinoic acid early transcript beta                             | <b>-8.29</b>  | <b>-12.69</b> |
| Apoa4   | apolipoprotein A-IV has a role in chylomicrons and VLDL         | <b>-8.25</b>  | <b>-9.43</b>  |
| Ntrk2   | catabolism                                                      | <b>-7.65</b>  | <b>-7.41</b>  |
| Clstn3  | neurotrophic tyrosine kinase, receptor, type 2                  | <b>-7.24</b>  | <b>-7.50</b>  |
| Tgfbli4 | calsyntenin 3 stabilizes APP metabolism                         | <b>-6.85</b>  | <b>-7.94</b>  |
|         | TGFβ-1-induced transcript 4 acts as a transcriptional repressor |               |               |

HFD, high-fat diet; HFDH, HFD+high DSF; HFDL, HFD+low DSF. SD, standard diet; SDH, SD+high DSF; SDL, SD+low DSF. **Boldface**: significant expression; *italic*, non-significant.

**Supplementary Table 2.** Partial list of GO Terms and pathways significantly affected in response to DSF supplementation in male C57BL/6 mice fed either a HFD or SD diet. Related to Fig. 1.

| GO Term                                                                                         | Zscore        |               |               |
|-------------------------------------------------------------------------------------------------|---------------|---------------|---------------|
|                                                                                                 | HFD-SD        | HFDH-HFD      | HFDL-HFD      |
| 02504-Antigen processing and presentation of peptide or polysaccharide antigen via MHC class II | <b>4.737</b>  | <b>-4.336</b> | 0             |
| 19886-Antigen processing and presentation of exogenous peptide antigen via MHC class II         | <b>4.582</b>  | <b>-3.971</b> | 0             |
| 42613-MHC Class II protein complex                                                              | <b>4.352</b>  | <b>-3.973</b> | 0             |
| 05764-Lysosome                                                                                  | <b>4.037</b>  | <b>-3.471</b> | <b>-3.591</b> |
| 08152-Metabolic process                                                                         | <b>3.131</b>  | <b>-6.379</b> | <b>-5.577</b> |
| 04029-Aldehyde dehydrogenase (NAD) activity                                                     | <b>2.896</b>  | <b>-5.226</b> | 0             |
| 06631-Fatty acid metabolic process                                                              | <b>2.774</b>  | <b>-4.688</b> | <b>-2.794</b> |
| 05634-Nucleus                                                                                   | <b>-5.452</b> | <b>2.042</b>  | <b>2.494</b>  |
| 03676-Nucleic acid binding                                                                      | <b>-5.097</b> | <b>1.991</b>  | <b>3.556</b>  |
| 06355-Regulation of transcription DNA-dependent                                                 | <b>-4.066</b> | <b>2.662</b>  | <b>3.336</b>  |
| 06350-Transcription                                                                             | <b>-3.927</b> | <b>1.892</b>  | <b>2.881</b>  |
| 45449-Regulation of transcription                                                               | <b>-3.218</b> | <b>3.073</b>  | <b>1.785</b>  |
| 05667-Transcription factor complex                                                              | <b>-3.077</b> | <b>2.576</b>  | <b>2.230</b>  |
| Pathway                                                                                         | HFD-SD        | HFDH-HFD      | HFDL-HFD      |
| Reactome metabolism of amino acids                                                              | <b>4.736</b>  | <b>-2.213</b> | 0             |
| KEGG valine leucine and isoleucine degradation                                                  | <b>4.581</b>  | <b>-4.658</b> | <b>-3.876</b> |
| Reactome regulation of insulin secretion                                                        | <b>3.950</b>  | 0             | <b>-4.021</b> |
| KEGG oxidative phosphorylation                                                                  | <b>3.487</b>  | 0             | <b>-1.994</b> |
| Reactome electron transport chain                                                               | <b>3.377</b>  | 0             | <b>-3.005</b> |
| KEGG propanoate metabolism                                                                      | <b>3.167</b>  | <b>-5.246</b> | <b>-5.352</b> |
| KEGG peroxisome                                                                                 | <b>2.849</b>  | <b>-3.338</b> | <b>-2.287</b> |
| KEGG butanoate metabolism                                                                       | <b>2.555</b>  | <b>-4.475</b> | <b>-4.517</b> |
| Reactome mitochondrial FFA $\beta$ -oxidation                                                   | <b>2.506</b>  | <b>-2.631</b> | 0             |
| KEGG lysosome                                                                                   | <b>2.368</b>  | 0             | <b>-3.134</b> |

| GO Term                                                                                         |  | SDH-SD        | SDL-SD       |
|-------------------------------------------------------------------------------------------------|--|---------------|--------------|
| 04364-Glutathione transferase activity                                                          |  | <b>9.188</b>  | <b>7.311</b> |
| 05830-Cytosolic ribosome                                                                        |  | <b>7.805</b>  | <b>7.711</b> |
| 06953-Acute phase response                                                                      |  | <b>7.334</b>  | <b>7.250</b> |
| 16712-Oxidoreductase activity acting on paired donors                                           |  | <b>7.202</b>  | 0            |
| 50381-Unspecific monooxygenase activity                                                         |  | <b>6.305</b>  | 0            |
| 06695-Cholesterol biosynthetic process                                                          |  | <b>4.970</b>  | 0            |
| 02504-Antigen processing and presentation of peptide or polysaccharide antigen via MHC class II |  | <b>-3.320</b> | 0            |
| 42613-MHC Class II protein complex                                                              |  | <b>-3.232</b> | 0            |

|                                                   |  |               |               |
|---------------------------------------------------|--|---------------|---------------|
| 32259-Methylation                                 |  | <b>-2.768</b> | 0             |
| 06886-Intracellular protein transport             |  | <b>-3.565</b> | <b>-2.463</b> |
| 05739-Mitochondrion                               |  | <b>-3.564</b> | <b>-6.141</b> |
| 09374-Biotin binding                              |  | <b>-3.274</b> | <b>-3.017</b> |
| 16573-Histone acetylation                         |  | <b>-2.169</b> | <b>-2.411</b> |
| Pathway                                           |  | SDH-SD        | SDL-SD        |
| Reactome Glutathione conjugation                  |  | <b>11.700</b> | <b>8.850</b>  |
| Reactome peptide chain elongation                 |  | <b>10.530</b> | <b>10.617</b> |
| KEGG ribosome                                     |  | <b>10.365</b> | <b>10.457</b> |
| KEGG metabolism of xenobiotics by cytochrome p450 |  | <b>10.060</b> | <b>7.968</b>  |
| Reactome cholesterol biosynthesis                 |  | <b>8.515</b>  | 0             |
| KEGG steroid biosynthesis                         |  | <b>5.490</b>  | 0             |
| KEGG Snare interactions in vesicular transport    |  | <b>-2.092</b> | 0             |
| Reactome hormone-sensitive lipase HSL-mediated TG |  | <b>-2.865</b> | <b>-2.552</b> |
| Reactome platelet activation triggers             |  | <b>-2.767</b> | <b>-2.827</b> |
| KEGG cytosolic DNA sensing pathway                |  | <b>-2.163</b> | <b>-3.761</b> |

HFD, high-fat diet; HFDH, HFD+high DSF; HFDL, HFD+low DSF. SD, standard diet; SDH, SD+high DSF; SDL, SD+low DSF. **Boldface**: significant expression; The entry '0' indicates no significant difference.



**Supplementary Table 3.** Partial list of genes whose expression levels in response to DSF supplementation were shared in male C57BL/6 mice fed both SD and HFD diets. Related to Fig. 1.

| Gene name     | Zratio       |               |               |               |               |
|---------------|--------------|---------------|---------------|---------------|---------------|
|               | HFD-SD       | HFDH-HFD      | HFDL-HFD      | SDH-SD        | SDL-SD        |
| Raet1b        | <b>4.52</b>  | <b>-12.08</b> | <b>-11.58</b> | <b>-8.29</b>  | <b>-12.69</b> |
| Raet1b        | <b>4.00</b>  | <b>-10.52</b> | <b>-10.84</b> | <b>-6.93</b>  | <b>-10.66</b> |
| Lgals1        | <b>3.16</b>  | <b>-10.33</b> | <b>-11.17</b> | <b>-4.85</b>  | <b>-5.80</b>  |
| 1600023A02R   | <b>3.06</b>  | <b>-10.44</b> | <b>-9.45</b>  | <b>-8.55</b>  | <b>-5.26</b>  |
| LOC268782     | <b>1.51</b>  | <b>-2.89</b>  | <b>-2.60</b>  | <b>-2.01</b>  | <b>-3.03</b>  |
| Igfbp2        | <b>-4.27</b> | <b>8.13</b>   | <b>9.14</b>   | <b>5.39</b>   | <b>6.46</b>   |
| Cdh1          | <b>-3.58</b> | <b>5.70</b>   | <b>4.43</b>   | <b>4.88</b>   | <b>4.89</b>   |
| Avpr1a        | <b>-3.20</b> | <b>6.14</b>   | <b>5.89</b>   | <b>4.04</b>   | <b>3.61</b>   |
| Avpr1a        | <b>-3.04</b> | <b>9.33</b>   | <b>8.35</b>   | <b>6.30</b>   | <b>5.08</b>   |
| Csad          | <b>-2.96</b> | <b>3.85</b>   | <b>3.78</b>   | <b>5.87</b>   | <b>7.23</b>   |
| Abca8a        | <b>-2.77</b> | <b>3.60</b>   | <b>3.11</b>   | <b>2.22</b>   | <b>2.78</b>   |
| Cyp2b20       | <i>6.15</i>  | <b>15.99</b>  | <b>17.87</b>  | <b>18.41</b>  | <b>24.34</b>  |
| Igfbp2        | <i>-3.20</i> | <b>8.80</b>   | <b>10.16</b>  | <b>6.12</b>   | <b>6.83</b>   |
| Socs2         | <i>3.24</i>  | <b>8.32</b>   | <b>5.38</b>   | <b>7.46</b>   | <b>7.72</b>   |
| Slco2a1       | <i>-1.36</i> | <b>5.73</b>   | <b>5.45</b>   | <b>6.42</b>   | <b>7.79</b>   |
| Cyp2c29       | <i>2.01</i>  | <b>4.95</b>   | <b>4.73</b>   | <b>7.96</b>   | <b>9.76</b>   |
| Cyp1a2        | <i>-0.59</i> | <b>4.92</b>   | <b>5.83</b>   | <b>2.85</b>   | <b>3.62</b>   |
| 3110082I17Rik | <i>1.31</i>  | <b>4.71</b>   | <b>3.79</b>   | <b>4.41</b>   | <b>3.92</b>   |
| Cyp1a2        | <i>-0.50</i> | <b>4.61</b>   | <b>5.76</b>   | <b>2.25</b>   | <b>2.62</b>   |
| Apom          | <i>0.01</i>  | <b>4.43</b>   | <b>3.40</b>   | <b>4.16</b>   | <b>3.92</b>   |
| Ptpre         | <i>0.61</i>  | <b>4.03</b>   | <b>3.15</b>   | <b>2.61</b>   | <b>2.09</b>   |
| Cyp2c37       | <i>1.45</i>  | <b>4.01</b>   | <b>3.65</b>   | <b>2.90</b>   | <b>2.36</b>   |
| Iap           | <i>-0.83</i> | <b>3.93</b>   | <b>3.60</b>   | <b>2.75</b>   | <b>1.91</b>   |
| Pnp           | <i>0.61</i>  | <b>3.85</b>   | <b>2.07</b>   | <b>2.47</b>   | <b>2.06</b>   |
| Foxq1         | <i>1.02</i>  | <b>3.50</b>   | <b>2.91</b>   | <b>4.01</b>   | <b>6.22</b>   |
| H13           | <i>-0.68</i> | <b>3.43</b>   | <b>1.74</b>   | <b>1.57</b>   | <b>1.73</b>   |
| Rpl12         | <i>0.22</i>  | <b>3.42</b>   | <b>2.36</b>   | <b>3.33</b>   | <b>3.41</b>   |
| Cyp4f13       | <i>-0.20</i> | <b>3.34</b>   | <b>2.68</b>   | <b>1.74</b>   | <b>2.24</b>   |
| Zfp259        | <i>-0.08</i> | <b>3.26</b>   | <b>2.73</b>   | <b>2.95</b>   | <b>1.96</b>   |
| Cyp2c50       | <i>1.46</i>  | <b>3.17</b>   | <b>3.44</b>   | <b>2.96</b>   | <b>2.42</b>   |
| Rps10         | <i>-0.03</i> | <b>3.11</b>   | <b>1.68</b>   | <b>1.62</b>   | <b>1.68</b>   |
| Cidea         | <i>1.64</i>  | <b>-16.66</b> | <b>-19.16</b> | <b>-14.49</b> | <b>-19.49</b> |
| Cfd           | <i>-0.79</i> | <b>-12.72</b> | <b>-15.73</b> | <b>-15.23</b> | <b>-17.91</b> |
| Mmd2          | <i>3.94</i>  | <b>-12.28</b> | <b>-12.47</b> | <b>-6.24</b>  | <b>-6.88</b>  |
| Clstn3        | <i>-0.25</i> | <b>-10.35</b> | <b>-10.57</b> | <b>-7.24</b>  | <b>-7.50</b>  |
| Robo1         | <i>2.53</i>  | <b>-8.49</b>  | <b>-8.50</b>  | <b>-2.86</b>  | <b>-4.58</b>  |
| Ntrk2         | <i>-1.65</i> | <b>-8.06</b>  | <b>-9.01</b>  | <b>-7.65</b>  | <b>-7.41</b>  |
| Bhmt          | <i>-0.17</i> | <b>-7.58</b>  | <b>-6.42</b>  | <b>-2.90</b>  | <b>-5.23</b>  |

|               |              |              |              |              |              |
|---------------|--------------|--------------|--------------|--------------|--------------|
| Slc17a8       | -2.38        | <b>-7.57</b> | <b>-3.09</b> | <b>-4.22</b> | <b>-4.25</b> |
| Anxa2         | <i>3.07</i>  | <b>-6.86</b> | <b>-8.69</b> | <b>-3.88</b> | <b>-5.15</b> |
| Lyplal1       | <i>0.18</i>  | <b>-5.55</b> | <b>-4.47</b> | <b>-1.98</b> | <b>-2.71</b> |
| Acot11        | <i>-1.52</i> | <b>-5.45</b> | <b>-4.01</b> | <b>-5.87</b> | <b>-5.79</b> |
| 1110028A07R   | <i>1.38</i>  | <b>-4.99</b> | <b>-5.10</b> | <b>-3.05</b> | <b>-2.42</b> |
| Rgs5          | <i>0.96</i>  | <b>-4.56</b> | <b>-3.25</b> | <b>-2.06</b> | <b>-1.94</b> |
| S100a11       | <i>1.90</i>  | <b>-4.19</b> | <b>-4.87</b> | <b>-2.34</b> | <b>-3.30</b> |
| Cd59b         | <i>-0.29</i> | <b>-4.16</b> | <b>-3.98</b> | <b>-2.62</b> | <b>-2.12</b> |
| BC026585      | <i>1.26</i>  | <b>-4.07</b> | <b>-5.32</b> | <b>-2.13</b> | <b>-2.80</b> |
| Slc44a1       | <i>-0.12</i> | <b>-3.98</b> | <b>-3.33</b> | <b>-1.81</b> | <b>-2.04</b> |
| 1300018L09Rik | <i>-1.39</i> | <b>-3.95</b> | <b>-1.83</b> | <b>-1.59</b> | <b>-1.61</b> |
| 1300013J15Rik | <i>0.39</i>  | <b>-3.94</b> | <b>-2.54</b> | <b>-5.08</b> | <b>-6.14</b> |
| 1300013J15Rik | <i>0.96</i>  | <b>-3.90</b> | <b>-2.90</b> | <b>-5.45</b> | <b>-5.74</b> |

HFD, high-fat diet; HFDH, HFD+high DSF; HFDL, HFD+low DSF; SD, standard diet; SDH, SD+high DSF; SDL, SD+low DSF. **Boldface**, significant expression; *italic*, non-significant.

**Supplementary Table 4.** List of the top 20 significantly changed proteins in the livers of rat treated with low (L-DSF) and high (H-DSF) doses of DSF vs. control chow (ctrl). FC, fold change. Related to Fig. 3.

| Protein_IDs                      | Protein_names                                               | Gene_names    | Global_Log10P_BH | Log10P_BH  |            | Log2FC       |              |
|----------------------------------|-------------------------------------------------------------|---------------|------------------|------------|------------|--------------|--------------|
|                                  |                                                             |               |                  | H-DSF-ctrl | L-DSF-ctrl | H-DSF-ctrl   | L-DSF-ctrl   |
| P46418;A0A0G2JB1;A0A0G2K8O5      | Glutathione S-transferase alpha-5                           | Gsta5         | 5.91             | 6.58       | 3.22       | <b>4.00</b>  | <b>3.33</b>  |
| B2GV28;A0A140UHW7;P00176f;1LMN1; | Cytochrome P450 2B1                                         | Cyp2b1        | 2.64             | 3.16       | 1.53       | <b>2.91</b>  | <b>2.63</b>  |
| P38918                           | Aflatoxin B1 aldehyde reductase member 3                    | Akr7a3        | 3.49             | 4.03       | 2.06       | <b>2.45</b>  | <b>1.70</b>  |
| G6T5E9;Q63662                    | UDP-glucuronosyltransferase 2B1                             | Ugt1a1;Ugt1a6 | 4.08             | 4.53       | 2.68       | <b>2.29</b>  | <b>1.86</b>  |
| P09875;A0A0G2JUD3                | UDP-glucuronosyltransferase 2B1                             | Ugt2b1        | 4.11             | 4.68       | 2.40       | <b>2.07</b>  | <b>1.75</b>  |
| G6T5E8;G6T5E7                    | Lambda-crystallin homolog                                   | Ugt1a1        | 2.72             | 3.19       | 1.62       | <b>1.88</b>  | <b>1.54</b>  |
| O811X6                           | Glutathione S-transferase alpha-2;Glutathione S-transferase | Cyt1          | 2.43             | 2.89       | 1.56       | <b>1.85</b>  | <b>1.50</b>  |
| P04903;Q4FZZ3                    | Pirin                                                       | Gsta2;Gsta5   | 6.11             | 6.68       | 3.19       | <b>1.58</b>  | <b>1.03</b>  |
| O5M827                           | Carboxylic ester hydrolase                                  | Pir           | 3.03             | 3.59       | 1.63       | <b>1.38</b>  | <b>1.11</b>  |
| Q32Q55                           | Metalloreductase STEAP3                                     | Ces2h         | 6.92             | 7.29       | 5.19       | <b>1.30</b>  | <b>0.96</b>  |
| A0A0H2U126;Q5RKL5                | Beta-glucuronidase                                          | Steap3        | 5.26             | 5.31       | 4.42       | <b>-1.07</b> | <b>-0.95</b> |
| F1LQO8;P06760;Q77P13             | Dimethylamine monoxygenase [N-oxide-forming] 5              | Gusb          | 9.62             | 9.45       | 8.98       | <b>-1.13</b> | <b>-1.04</b> |
| Q8K4C0                           | Arylacetamide deacetylase                                   | Fmos          | 7.92             | 8.38       | 5.99       | <b>-1.14</b> | <b>-0.72</b> |
| Q5I0ND;Q9QZH8                    | Trifunctional enzyme subunit beta, mitochondrial;3-ketoacyl | Aadac         | 4.35             | 4.91       | 2.67       | <b>-1.18</b> | <b>-0.60</b> |
| G60587;A0A0G2K330                | Trifunctional enzyme subunit alpha, mitochondrial;long-ch   | Hadhb         | 8.76             | 9.16       | 6.95       | <b>-1.19</b> | <b>-0.83</b> |
| G64428                           | PHD finger protein 11                                       | Phf11b;Phf11  | 9.12             | 9.45       | 7.37       | <b>-1.22</b> | <b>-0.86</b> |
| MORB46;Q5I0E2;F1LQ59             | Acyl-coenzyme A amino acid N-acyltransferase 2              | Achna2        | 2.56             | 2.46       | 2.33       | <b>-1.28</b> | <b>-1.68</b> |
| Q5FVR5;A0A0G2IV92;A0A0G2K2H6     | Cytochrome P450 3A2                                         | Cyp3a2        | 3.86             | 4.15       | 2.83       | <b>-1.38</b> | <b>-0.97</b> |
| P05183                           | Acetyl-CoA acetyltransferase, mitochondrial                 | Acat1         | 4.68             | 4.81       | 4.06       | <b>-1.50</b> | <b>-1.34</b> |
| P17764                           |                                                             |               | 8.47             | 8.60       | 7.08       | <b>-1.75</b> | <b>-1.31</b> |

**Supplementary Table 5.** Enrichment of KEGG pathways (from STRING) and GSEA report establishing a number of KEGG pathways statistically significant in livers of DSF-treated rats vs. controls. Related to Fig. 3.

| # term ID | Term description                             | # Genes | Fdr      |
|-----------|----------------------------------------------|---------|----------|
| mmu01100  | Matabolic pathways                           | 31      | 6.94E-17 |
| mmu00983  | Drug metabolism – other enzymes              | 12      | 2.51E-14 |
| mmu00980  | Metabolism of xenobiotics by cytochrome P450 | 10      | 2.12E-12 |
| mmu05204  | Chemical carcinogenesis                      | 10      | 3.80E-11 |
| mmu00982  | Drug metabolism – cytochrome P450            | 9       | 7.27E-11 |
| mmu00380  | Tryptophan metabolism                        | 6       | 2.40E-07 |
| mmu00071  | Fatty acid degradation                       | 6       | 3.73E-07 |
| mmu01212  | Fatty acid metabolism                        | 6       | 3.73E-07 |
| mmu00280  | Valine, leucine and isoleucine degradation   | 6       | 5.04E-07 |
| mmu00480  | Glutathione metabolism                       | 6       | 8.11E-07 |

| KEGG pathway                              | # Genes | ES    | NES   | NOM <i>P</i> -val | Q-value |
|-------------------------------------------|---------|-------|-------|-------------------|---------|
| Drug_Metabolism_CYP450                    | 35      | 0.747 | 1.689 | 0.000             | 0.055   |
| Peroxisome                                | 57      | 0.600 | 1.693 | 0.004             | 0.064   |
| Snare_Interactions_in_Vesicular_Transport | 19      | 0.571 | 1.696 | 0.004             | 0.077   |
| Metabolism_of_Xenobiotics_by_CYP450       | 30      | 0.824 | 1.715 | 0.000             | 0.084   |
| Retinol_Metabolism                        | 16      | 0.783 | 1.617 | 0.006             | 0.094   |
| Proteasome                                | 37      | 0.642 | 1.785 | 0.018             | 0.117   |
| Glutathione_Metabolism                    | 34      | 0.686 | 1.718 | 0.000             | 0.124   |
| PPAR_Signaling_Pathway                    | 38      | 0.497 | 1.447 | 0.048             | 0.246   |
| Tyrosine_Metabolism                       | 17      | 0.586 | 1.463 | 0.082             | 0.249   |

# Gene, number of genes in Geneset; ES, enrichment score; NES, normalized ES; NOM *P*-val, normalized *P* value; Q-value, false discovery rate with cut-off value of 0.25.

**Supplementary Table 6.** List of murine oligonucleotide primers used for validation of microarray analysis. Related to Fig. 1.

| Target mRNA | Primer     | Sequence (5' → 3')                                |
|-------------|------------|---------------------------------------------------|
| Igfbp2      | For<br>Rev | CAGACGCTACGCTGCTATCC<br>CCCTCAGAGTGGTCGTCATCA     |
| Avpr1A      | For<br>Rev | GCTGGCGGTGATTTTCGTG<br>GCAAACACCTGCAAGTGCT        |
| Cyp2c29     | For<br>Rev | CATCGACCTCCTCCCCACTAGC<br>GGTTGGGAAACTCCTTGCTGTCA |
| Socs2       | For<br>Rev | AGTTCGCATTCAGACTACCTACT<br>TGGTACTCAATCCGCAGGTTAG |
| Raet1b      | For<br>Rev | TGGACACTCACAAGACCAATG<br>CCCAGGTGGCACTAGGAG       |
| Acot11      | For<br>Rev | TGGGGAGCTGAGCATTGGA<br>GGCCGACACTAATGGTATGGT      |
| Cidea       | For<br>Rev | ATCACAACCTGGCCTGGTTACG<br>TACTACCCGGTGTCCATTTCT   |
| Hprt        | For<br>Rev | TGGGAGGCCATCACATTGT<br>GCTTTTCCAGTTTCACTAATGACA   |
| 18S         | For<br>Rev | GTAACCCGTTGAACCCATT<br>CCATCCAATCGGTAGTAGCG       |

Figure S1e

Figure 1i

SDH SDL SD HFD HF DL HFDH

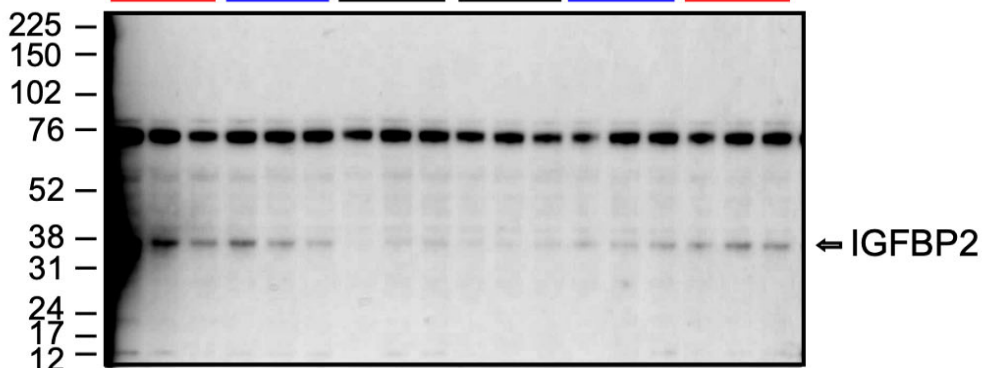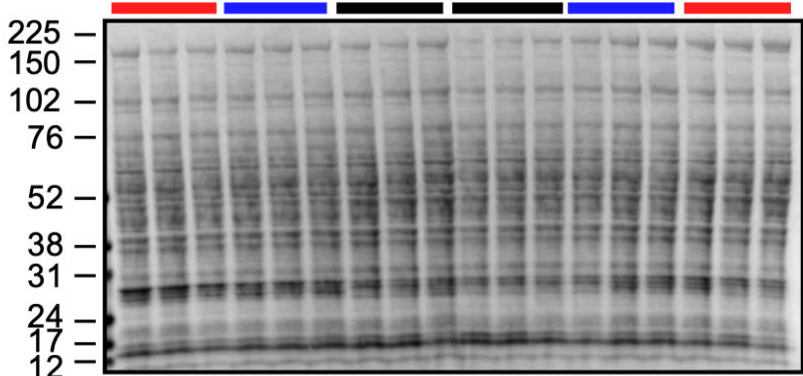

Ponceau S staining

SDH SDL SD HFD HF DL HFDH

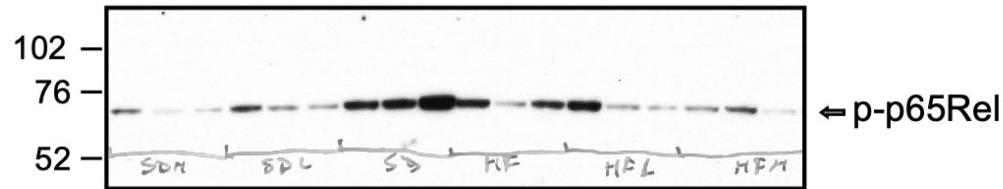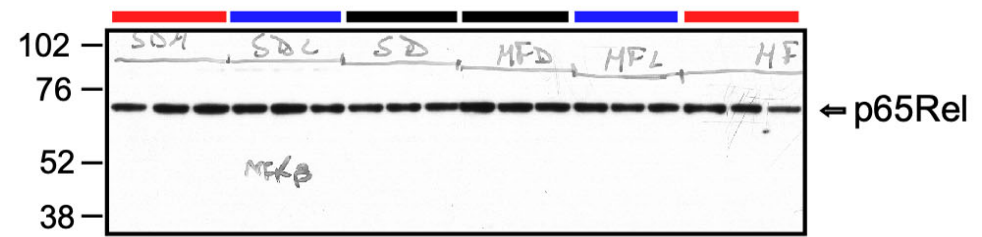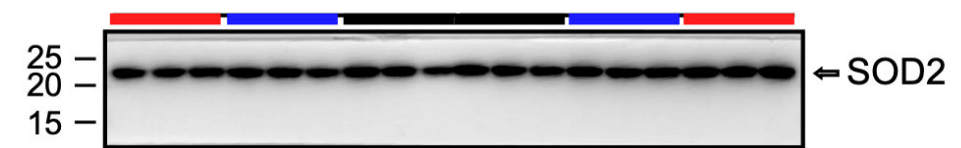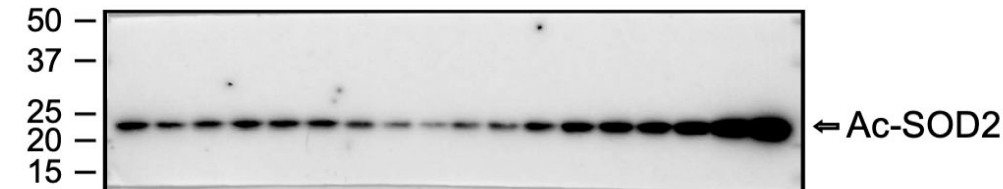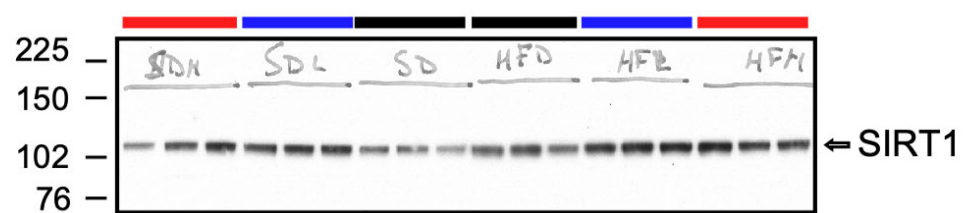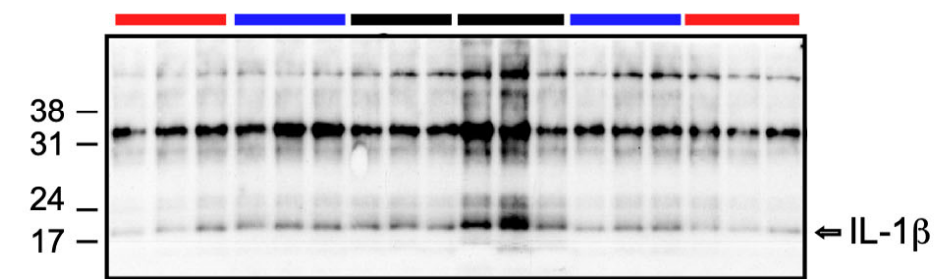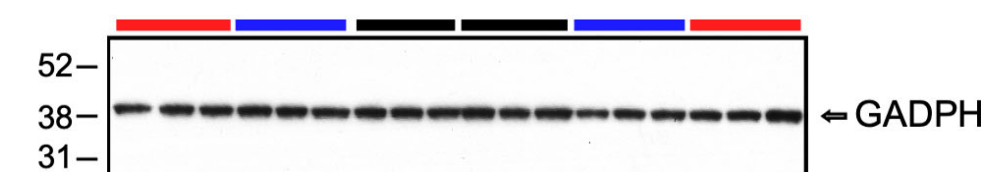

Supplement: 41514_2020_46_MOESM2_ESM.pdf [file 41514_2020_46_MOESM2_ESM.pdf]
